# Supplementary material for: Electrocatalytic nitrogen reduction to ammonia by graphene-supported Au4Cu2 and Au2Ag2 nanoclusters
Source: Royal Society of Chemistry journal article supplement (doi:10.1039/d4nr05341a), 2025-01-01
Supplement: d4nr05341a1.pdf [file d4nr05341a1.pdf]

## ***Supporting Information for***

### **Electrocatalytic Nitrogen Reduction to Ammonia by Graphene-Supported Au<sub>4</sub>Cu<sub>2</sub> and Au<sub>2</sub>Ag<sub>2</sub> Nanoclusters**

Aamir Shehzad,<sup>ab</sup> Qiu hao Yi,<sup>a</sup> Chaonan Cui,<sup>a</sup> Zhixun Luo<sup>\*ab</sup>

*State Key Laboratory for Structural Chemistry of Unstable and Stable Species, Institute of Chemistry, Chinese Academy of Sciences, Beijing 100190, China; School of Chemistry, University of Chinese Academy of Sciences, Beijing 100049, China.*

\* Corresponding author. Email: zlxuo@iccas.ac.cn (ZL).

## **S1. Materials and Methods**

**Materials.** The chemicals and reagents utilized for the synthesis of these clusters comprise silver nitrate (AgNO<sub>3</sub>, 99.999%, Alfer Aeser), cupric acetate [Cu(OAc)<sub>2</sub>, 99.999%, Alfer Aeser], phenylacetylene (PA, C<sub>8</sub>H<sub>6</sub>, 98%, Innochem), sodium borohydride (NaBH<sub>4</sub>, ≥98.0%, Sigma Aldrich), chloro(triphenylphosphine)gold(I) (PPh<sub>3</sub>)AuCl (99%, Innochem), dichloromethane (CH<sub>2</sub>Cl<sub>2</sub>), and absolute ethanol (C<sub>2</sub>H<sub>5</sub>OH, ≥99.8%, Sigma-Aldrich). All experiments employed ultrapure H<sub>2</sub>O. All chemicals were procured from commercial sources and used as received. Various chemicals, including graphene, KOH, NaOH, HCl, salicylic acid, sodium citrate, sodium hypochlorite (NaClO), sodium nitroferricyanide dihydrate (C<sub>5</sub>FeN<sub>6</sub>Na<sub>2</sub>O.2H<sub>2</sub>O), NH<sub>4</sub>Cl, p-dimethylaminobenzaldehyde (C<sub>9</sub>H<sub>11</sub>NO), hydrazine monohydrate (N<sub>2</sub>H<sub>4</sub>.H<sub>2</sub>O), and Nafion D521 (5 wt%), were acquired commercially and used without additional purification. The water utilized for the experiment was Milli-Q water, generated by a Millipore system. Carbon paper electrode was used for the ENRR experiments.

**Quantification of hydrazine byproduct.** During the reduction of N<sub>2</sub> to NH<sub>3</sub>, hydrazine (N<sub>2</sub>H<sub>2</sub>) serves as a competitive by-product. The quantity of hydrazine was spectrophotometrically measured by the Watt and Chrisp method.<sup>1</sup> Under acidic circumstances, hydrazine reacts with p-dimethylaminobenzaldehyde (C<sub>9</sub>H<sub>11</sub>NO) to yield yellow molecules that demonstrate UV-vis absorbance at 455 nm, enabling the spectrophotometric detection of N<sub>2</sub>H<sub>2</sub>. This study employed a color reagent solution comprising 30 mL of HCl, 300 mL of ethanol, and 5.99 g of p-

dimethylaminobenzaldehyde. The standard reference solutions were prepared with  $\text{N}_2\text{H}_4 \cdot \text{H}_2\text{O}$  (85%) at concentrations of 0, 0.1, 0.2, 0.3, 0.4, 0.5, and 0.6  $\mu\text{g} \cdot \text{mL}^{-1}$  to establish the calibration curve. To ascertain hydrazine levels, 5 mL of the color reagent and 5 mL of each reference solution were included in the ENRR solution for analysis. After a 15-minute incubation period, absorbance was assessed at 457 nm. The UV-vis absorption data for  $\text{N}_2\text{H}_4$  standard solutions produced a calibration curve described by the equation  $y = 1.290x - 0.00379$  ( $R^2 = 0.999$ ), demonstrating a robust linear relationship between absorbance values and hydrazine concentrations (Fig. S2). The hydrazine yield for each ENRR experiment was assessed by combining 5 mL of the color reagent with 5 mL of the residual electrolyte, followed by the acquisition of UV-vis absorption spectra after a 15-minute incubation period.

**Instrumentation.** The UV-visible absorption spectra were obtained utilizing a Shimadzu UV-3600 UV-vis-NIR spectrophotometer. The single-crystal X-ray diffraction (SC-XRD) results were obtained using a Rigaku MM007HF Saturn724+ single-crystal X-ray diffractometer with Mo  $K\alpha$  radiation ( $\lambda = 0.71073 \text{ \AA}$ ). The single crystal structure was elucidated using direct techniques and refined by full-matrix least-squares on  $F^2$ . The infrared (IR) analysis was performed utilizing the VETEX 70v. X-ray photoelectron spectroscopy (XPS) was conducted using a Thermo Fisher Scientific Escalab250Xi spectrometer to elucidate the surface atoms in the single crystal structure, based on crystal structure data and core-level binding energies (BEs) relative to their surface oxidation states. The high-resolution morphological characteristics of graphene-supported nanoclusters were analysed using a high-resolution transmission electron microscope (HRTEM) JSM200FS.

**Computational Method.** The DFT-calculated energy diagrams and TD-DFT calculations were performed using the Gaussian 16 program,<sup>2</sup> employing the LANL2TZ basis set for metal atoms (Au, Ag, and Cu) and the STO-3G basis set for nonmetal atoms (H, C, and P). The PBE0 hybrid functional was utilized to model the electronic structure and absorption spectrum of several ligand-protected metal clusters by incorporating 10-100 potential transitions. Multiwfn software was used to plot the charge transfer spectra to intuitively analyze the intrinsic characteristics of the electronic excitation and the subsequent redistribution.

## S2. Experimental Details

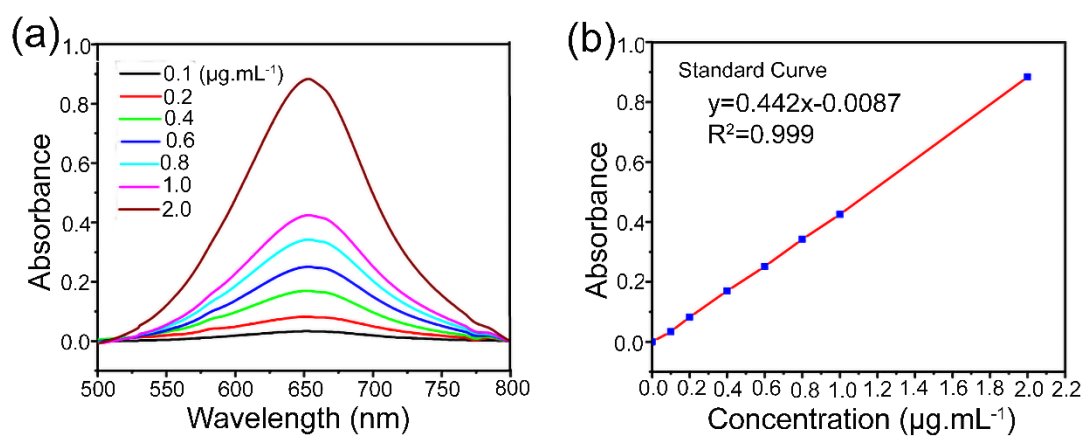

**Fig. S1** (a) UV-vis absorption spectra of indophenol assays with  $\text{NH}_4^+$  ions after incubation for 2 hours at room temperature in dark conditions. (b) Calibration curve used for determination of  $\text{NH}_3$  concentration.

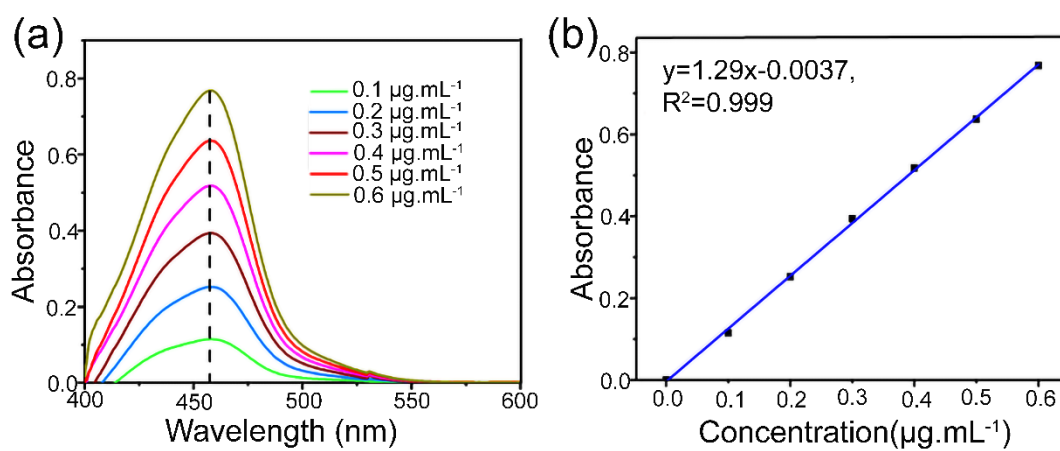

**Fig. S2** (a) UV-vis absorption spectra for  $\text{N}_2\text{H}_4$  standard solutions with different concentrations. (b) Calibration curve used for estimation of  $\text{N}_2\text{H}_4$  concentration.

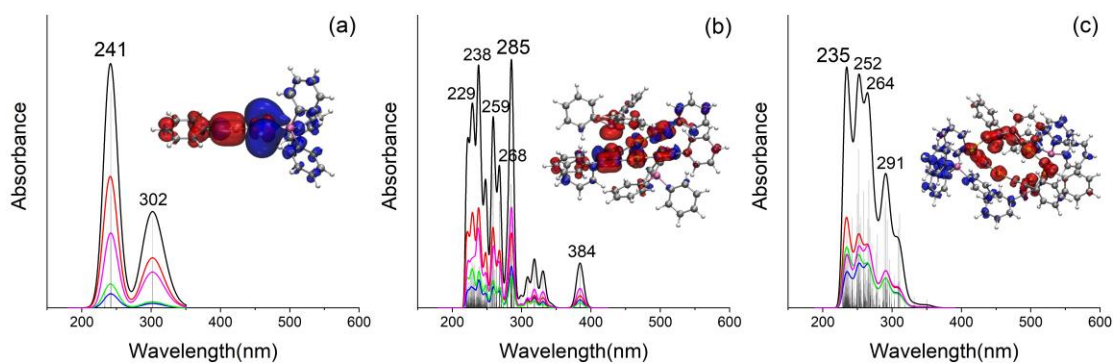

**Fig. S3** Hole-electron analysis and TDDFT-calculated charge-transfer spectra of different ligand-protected metal clusters featuring **(a)** single Au atom, **(b)**  $\text{Au}_2\text{Ag}_2$  and **(c)**  $\text{Au}_4\text{Cu}_2$  as the centre, respectively. The lines in black, red, blue, green and purple represent the total spectrum, redistribution of ligand, redistribution of metal, electron transfer from metal to ligand, and electron transfer from ligand to metal, respectively. The insets display the hole (red)-electron (blue) distribution of the corresponding excited state for the dominant peak in the UV-vis absorption spectrum.

We conducted the hole-electron analysis to depict the excitation process corresponding to the UV-vis absorption peaks of the  $\text{Au}_2\text{Ag}_2(\text{PPh}_3)_2(\text{PhC}\equiv\text{C})_4$ ,  $\text{Au}_4\text{Cu}_2(\text{PPh}_3)_4(\text{PhC}\equiv\text{C})_6$  and  $\text{Au}(\text{PPh}_3)(\text{PhC}\equiv\text{C})$  clusters. As we can see in the insets of Fig. S3a, the hole distribution locates on the phenylacetylene ligand, while the electron distribution mainly locates on Au atom and triphenylphosphine ligand, suggesting that the excitation of electrons is from the electron-rich phenylacetylene ligand to triphenylphosphine ligand and Au metal atom, which is consistent with previous results of charge transfer spectrum. For  $\text{Au}_2\text{Ag}_2(\text{PPh}_3)_2(\text{PhC}\equiv\text{C})_4$  crystal (Fig. S3b), the portion of charge transfer from ligand to metal grows, which could be explained by the enhanced ligand-metal interaction through the coordination between added Ag atom and C atom in triphenylphosphine ligand. For  $\text{Au}_4\text{Cu}_2(\text{PPh}_3)_4(\text{PhC}\equiv\text{C})_6$  crystal (Fig. S3c), the portion of charge transfer from metal to ligand also grows, and the excitation of electrons is from phenylacetylene ligand and Cu atom to phenylacetylene ligand accordingly. The reversed charge transfer might come from the reduced electronegativity of the Cu atom compared to Au and Ag atoms. In general, dppy ligand tends to donate electrons and remain holes in the excitation process, while the phenylacetylene ligand serves as an electron acceptor. The centre metal atom or clusters could either donate or accept electrons, which depends on their intrinsic electronegativity and structure. So, the adjustment of different coordination numbers of ligands and the kind of metal centre in these metal clusters refines the shape and peak position of their UV-vis absorption spectrum.

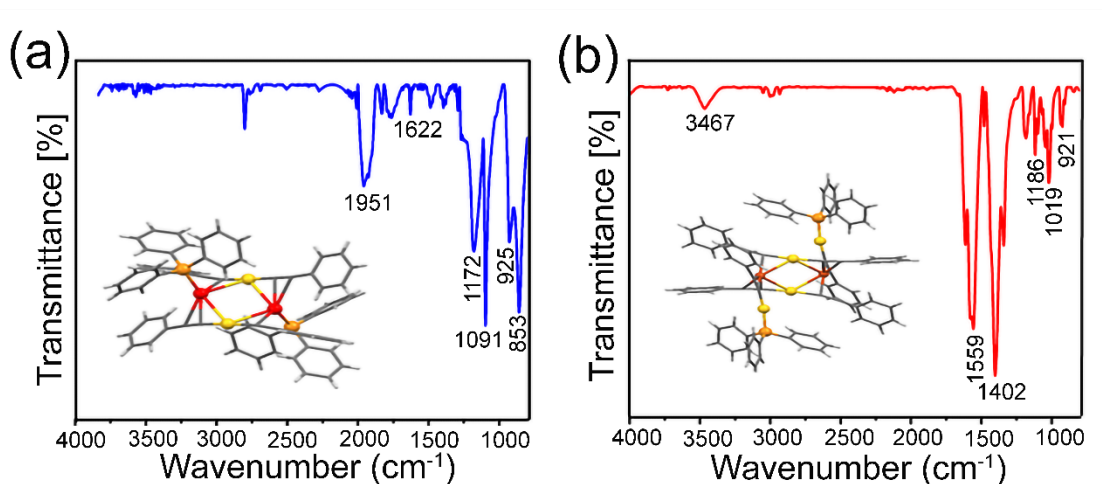

**Fig. S4** IR spectra of the  $\text{Au}_2\text{Ag}_2(\text{PPh}_3)_2(\text{PhC}\equiv\text{C})_4$  **(a)** and  $\text{Au}_4\text{Cu}_2(\text{PPh}_3)_4(\text{PhC}\equiv\text{C})_6$  **(b)** nanoclusters.

The IR spectra reveal that the sharp peak at  $853\text{ cm}^{-1}$  corresponds to the out-of-plane C–H bending vibrations of phenyl rings or may represent P–C stretching vibrations. A medium signal at  $925\text{ cm}^{-1}$  is attributed to C–H bending vibrations associated with the asymmetrical bending of the phenyl-acetylene ligands in the produced cluster. The notable peak at  $1091\text{ cm}^{-1}$  is likely linked to the C–C stretching of the phenyl-acetylene ligand. A medium peak at  $1172\text{ cm}^{-1}$  signifies C–C stretching in aromatic compounds, showing the presence of phenyl rings in the synthesized clusters. The notable peak at  $1951\text{ cm}^{-1}$  likely indicates  $\text{C}\equiv\text{C}$  stretching vibrations, characteristic of alkynes, suggesting the presence of the phenyl-acetylene ligand. A slight peak at  $1622\text{ cm}^{-1}$  may suggest  $\text{C}=\text{C}$  stretching vibrations of such conjugated systems with the phenyl groups.

Fig. S4b shows the IR-spectra of the  $\text{Au}_4\text{Cu}_2$  NCs. According to the IR spectrum, the weak peaks at  $921\text{ cm}^{-1}$ ,  $1019\text{ cm}^{-1}$ , and  $1186\text{ cm}^{-1}$  are characteristic of C–H bending vibrations in aromatic rings, suggesting that the phenyl group is intact. The weak signal at  $1334\text{ cm}^{-1}$  and strong peak at  $1402\text{ cm}^{-1}$  are likely due to C–C and  $\text{C}=\text{C}$  stretching in aromatic systems. The broad peak at  $1559\text{ cm}^{-1}$  further supports the presence of aromatic  $\text{C}=\text{C}$  stretching. The weak peaks at  $2931\text{ cm}^{-1}$  and  $3467\text{ cm}^{-1}$  suggest minor aliphatic C–H and O–H stretching, possibly due to solvent residues/moisture.

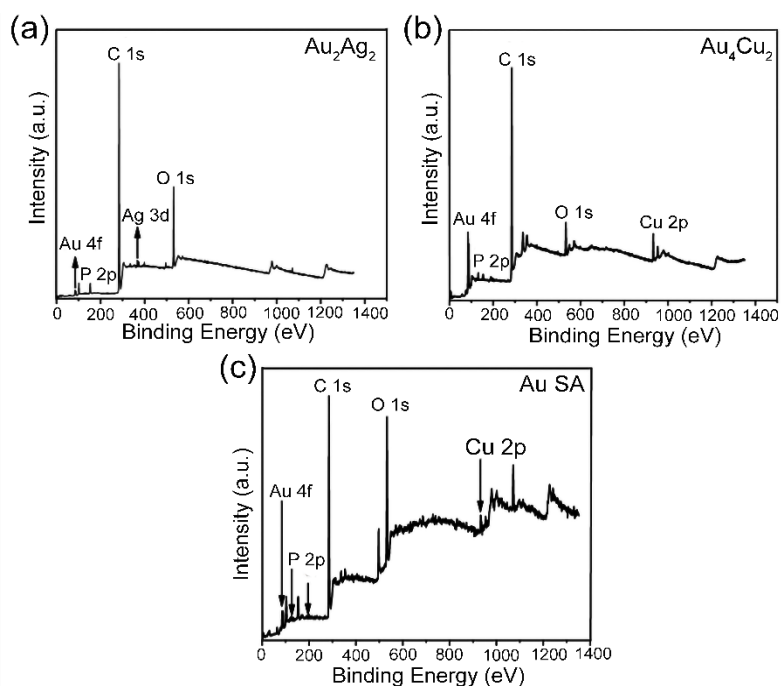

**Fig. S5** XPS survey spectra of (a) Au<sub>2</sub>Ag<sub>2</sub> NCs and (b) Au<sub>4</sub>Cu<sub>2</sub> NCs, in comparison with that of the Au complex (c).

The XPS survey spectra of the Au complex, Au<sub>2</sub>Ag<sub>2</sub> and Au<sub>4</sub>Cu<sub>2</sub> NCs are presented in Fig. S5, demonstrating the alignment of data with SC-XRD results.

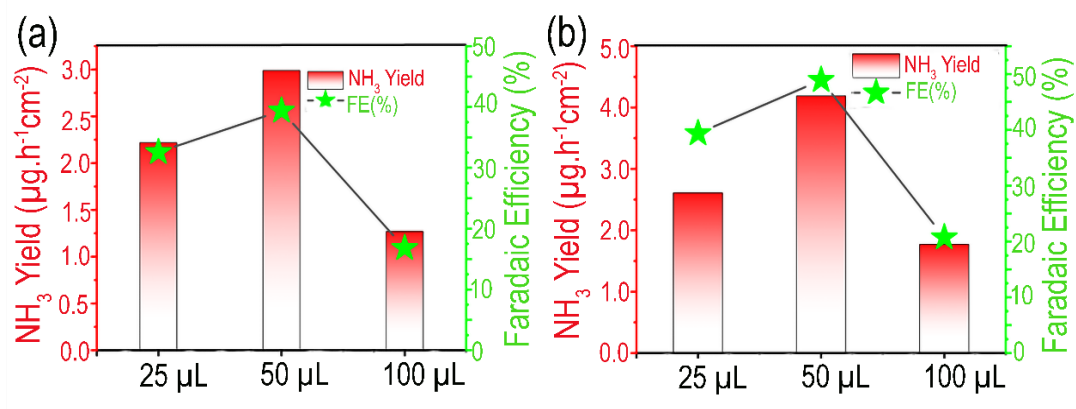

**Fig. S6** Comparison of ENRR performance using graphene-supported Au<sub>4</sub>Cu<sub>2</sub> NCs with (a) 25 mg and (b) 50 mg of graphene amounts and varying loading volumes (25 μL, 50 μL, and 100 μL) at -0.8 V vs. RHE.

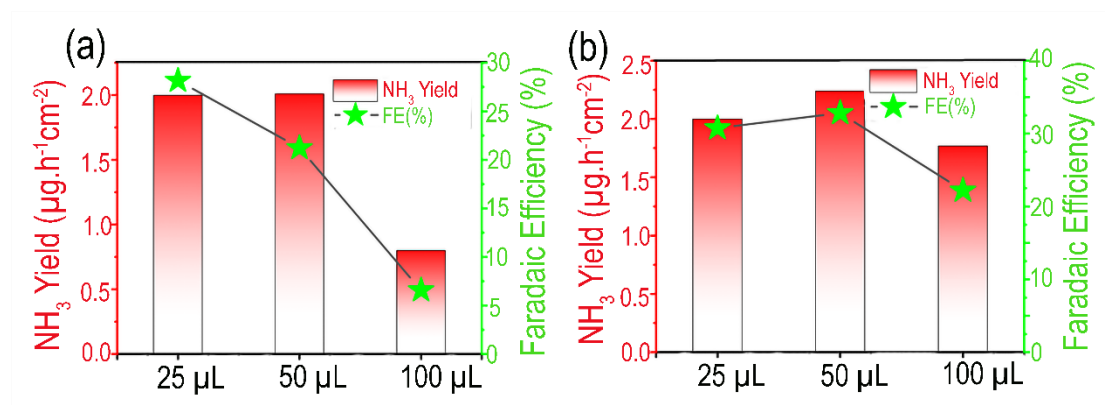

**Fig. S7** Comparison of ENRR performance using graphene-supported **Au<sub>2</sub>Ag<sub>2</sub>** NCs with **(a)** 25 mg **(b)** 50 mg of graphene amounts and varying loading volumes (25 μL, 50 μL, and 100 μL) at -0.8 V vs. RHE.

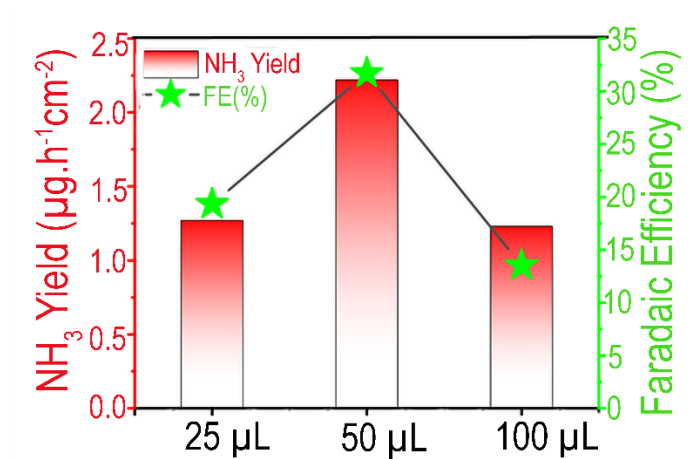

**Fig. S8** Comparison of ENRR performance using 50 mg of graphene-supported Au(PPh<sub>3</sub>)(PhC≡C) with varying loading volumes (25 μL, 50 μL, and 100 μL) at -0.8 V vs. RHE.

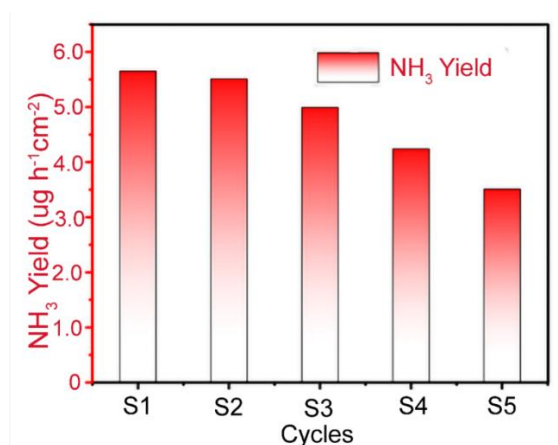

**Fig. S9** NH<sub>3</sub> yield using graphene-supported Au<sub>4</sub>Cu<sub>2</sub> NCs at -0.8 V vs. RHE during recycling test 5 times.

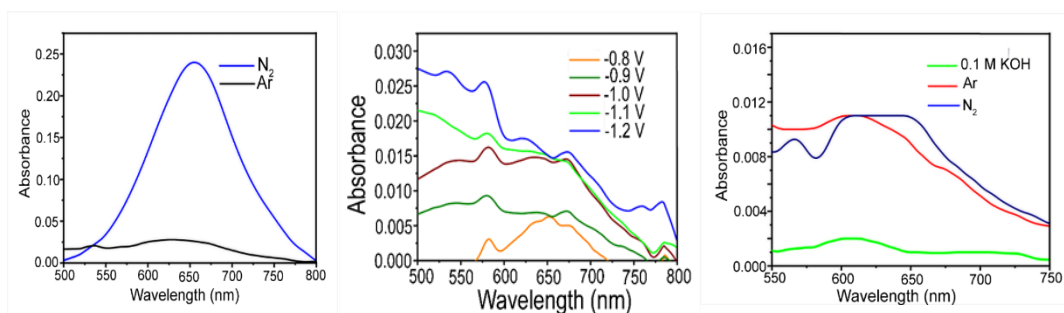

**Fig. S10 (Left)** NRR test in two different environments ( $N_2$  or Ar) to confirm the source of ammonia using 0.1 M KOH as the electrolyte at -0.8 V vs. RHE. **(Middle)** Exclusion NRR tests in Ar-saturated environment using 0.1 M KOH as the electrolyte at potentials ranging from -1.2 V to -0.8 V vs. RHE. **(Right)** Exclusion NRR test without catalyst in different environments.

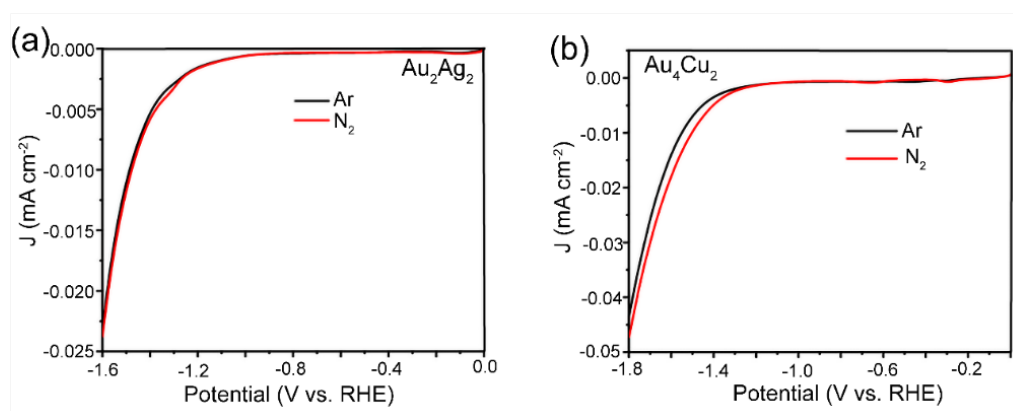

**Fig. S11** A comparison of NRR activity confirmation by unsupported **(a)**  $Au_2Ag_2$  and **(b)**  $Au_4Cu_2$  nanoclusters.

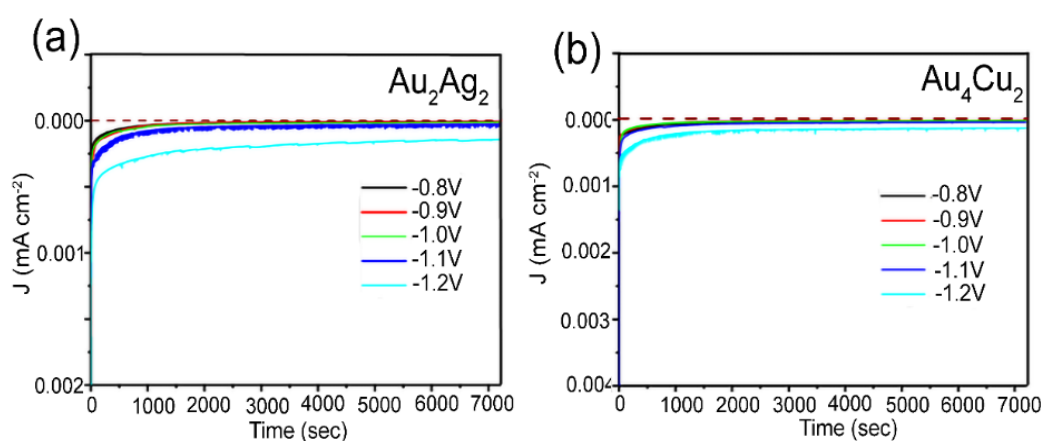

**Fig. S12** A comparison of chronoamperometry curves at corresponding potentials using unsupported **(a)**  $Au_2Ag_2$  and **(b)**  $Au_4Cu_2$  nanoclusters.



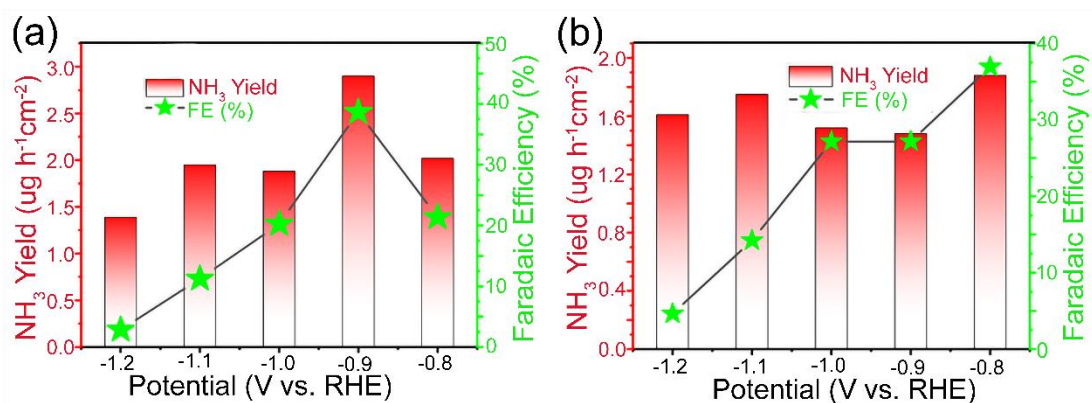

**Fig. S13** A comparison of ammonia yield rate and Faradaic efficiencies for unsupported (a)  $\text{Au}_4\text{Cu}_2$  (a) and (b)  $\text{Au}_2\text{Ag}_2$  nanoclusters at varying potentials.

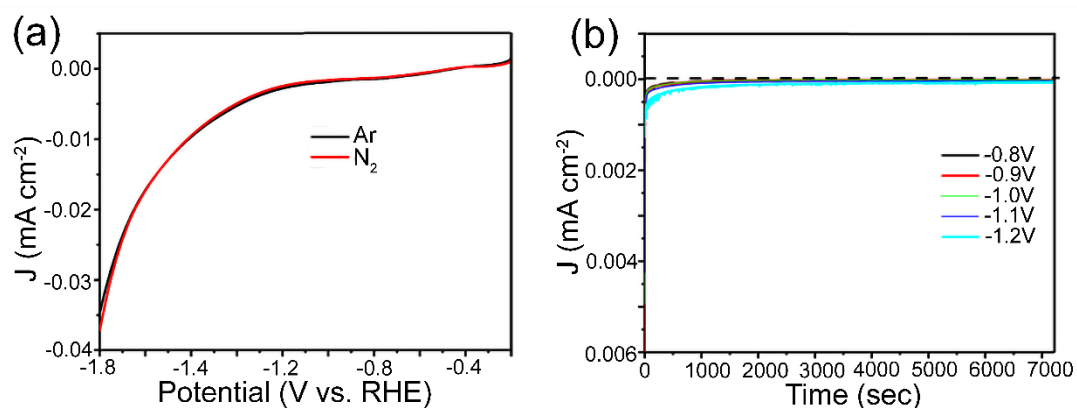

**Fig. S14** A comparison of LSV curves for  $\text{Au}_2\text{Ag}_2$  NCs on graphene in  $\text{N}_2$  and Ar-saturated 0.1 M KOH electrolyte solution (a), and the time-dependent current density curves for  $\text{Au}_2\text{Ag}_2$  on graphene at various potentials in 0.1 M KOH solution (b).

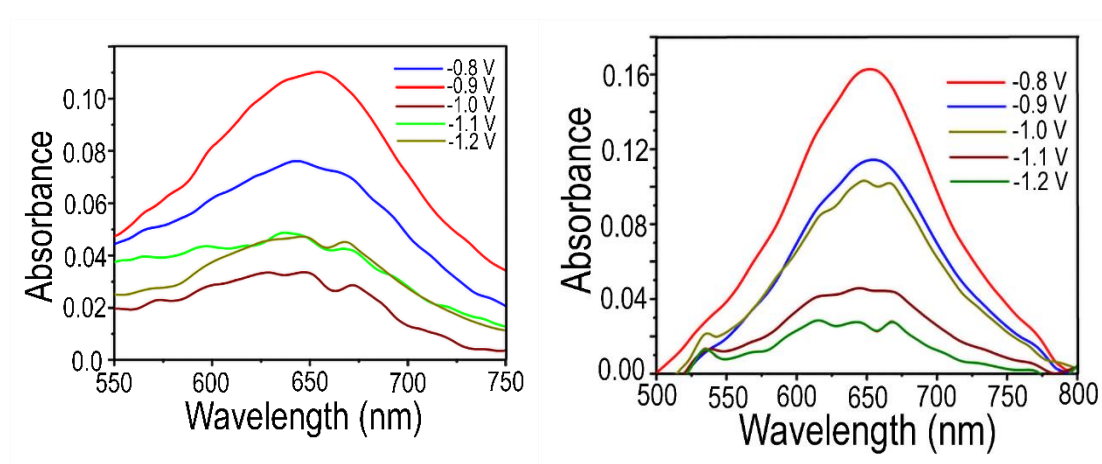

**Fig. S15** A comparison of UV-visible absorption spectra of the graphene-supported  $\text{Au}_2\text{Ag}_2$  (Left) and  $\text{Au}_4\text{Cu}_2$  (Right) NCs for ENRR at different potentials after 2 hours incubation using indophenol assay.

**Table S1** Crystallographic data for the Au<sub>4</sub>Cu<sub>2</sub>, Au<sub>2</sub>Ag<sub>2</sub> Nanoclusters and Au complex.

|                                              | In this Work                                                                   | In this Work                                                                   | In this Work                                                           |
|----------------------------------------------|--------------------------------------------------------------------------------|--------------------------------------------------------------------------------|------------------------------------------------------------------------|
| Empirical formula                            | C <sub>84</sub> H <sub>60</sub> Au <sub>4</sub> Cu <sub>2</sub> P <sub>2</sub> | C <sub>68</sub> H <sub>50</sub> Ag <sub>2</sub> Au <sub>2</sub> P <sub>2</sub> | 3(C <sub>26</sub> H <sub>20</sub> AuP)·CH <sub>2</sub> Cl <sub>2</sub> |
| Formula weight                               | 2046.20                                                                        | 1538.69                                                                        | 1765.99                                                                |
| Temperature (K)                              | 170.00(10)                                                                     | 110.01(10)                                                                     | 170.00(10)                                                             |
| Crystal system                               | triclinic                                                                      | monoclinic                                                                     | monoclinic                                                             |
| Space group                                  | P-1                                                                            | P2 <sub>1</sub> /n                                                             | P2 <sub>1</sub> /n                                                     |
| a (Å)                                        | 12.6398(6)                                                                     | 11.3993(2)                                                                     | 13.1746(8)                                                             |
| b (Å)                                        | 16.7456(9)                                                                     | 21.6280(3)                                                                     | 12.7141(8)                                                             |
| c (Å)                                        | 18.5200(9)                                                                     | 21.9620(3)                                                                     | 39.686(4)                                                              |
| α (deg)                                      | 88.962(4)                                                                      | 90                                                                             | 90                                                                     |
| β (deg)                                      | 76.498(4)                                                                      | 93.7590(10)                                                                    | 94.670(7)                                                              |
| γ (deg)                                      | 69.963(4)                                                                      | 90                                                                             | 90                                                                     |
| Volume (Å <sup>3</sup> )                     | 3572.7(3)                                                                      | 5402.95(14)                                                                    | 6625.5(9)                                                              |
| Z                                            | 2                                                                              | 4                                                                              | 4                                                                      |
| ρ <sub>calc</sub> (g/cm <sup>3</sup> )       | 1.902                                                                          | 1.892                                                                          | 1.770                                                                  |
| μ (mm <sup>-1</sup> )                        | 8.855                                                                          | 6.230                                                                          | 6.824                                                                  |
| F(000)                                       | 1936.0                                                                         | 2960.0                                                                         | 3408.0                                                                 |
| Crystal size (mm <sup>3</sup> )              | 0.26 × 0.08 × 0.03                                                             | 0.23 × 0.21 × 0.11                                                             | 0.02 × 0.01 × 0.01                                                     |
| 2θ range for data collection (deg)           | 3.534 to 62.068                                                                | 3.766 to 62.042                                                                | 3.346 to 62.188                                                        |
| Index ranges                                 | -18 ≤ h ≤ 17, -23 ≤ k ≤ 22, -20 ≤ l ≤ 26                                       | -14 ≤ h ≤ 14, -25 ≤ k ≤ 29, -21 ≤ l ≤ 31                                       | -18 ≤ h ≤ 14, -18 ≤ k ≤ 14, -56 ≤ l ≤ 55                               |
| Reflections collected                        | 59738                                                                          | 45818                                                                          | 49079                                                                  |
| Independent reflections                      | 19237 [R <sub>int</sub> = 0.0594, R <sub>sigma</sub> = 0.0724]                 | 14759 [R <sub>int</sub> = 0.0235, R <sub>sigma</sub> = 0.0271]                 | 17752 [R <sub>int</sub> = 0.1156, R <sub>sigma</sub> = 0.1321]         |
| Data / restraints / parameters               | 19237/127/829                                                                  | 14759/0/667                                                                    | 17752/474/784                                                          |
| Goodness-of-fit on F <sup>2</sup>            | 1.056                                                                          | 1.027                                                                          | 1.095                                                                  |
| Final R indexes [I >= 2σ (I)]                | R <sub>1</sub> = 0.0517, wR <sub>2</sub> = 0.1200                              | R <sub>1</sub> = 0.0259, wR <sub>2</sub> = 0.0598                              | R <sub>1</sub> = 0.1560, wR <sub>2</sub> = 0.3465                      |
| Final R indexes [all data]                   | R <sub>1</sub> = 0.0851, wR <sub>2</sub> = 0.1306                              | R <sub>1</sub> = 0.0310, wR <sub>2</sub> = 0.0612                              | R <sub>1</sub> = 0.2070, wR <sub>2</sub> = 0.3686                      |
| Largest diff. peak/hole (e Å <sup>-3</sup> ) | 5.66/-1.91                                                                     | 1.33/-1.84                                                                     | 5.54/-7.31                                                             |

**Table S2** A comparison of NRR performance of graphene-supported Au<sub>4</sub>Cu<sub>2</sub> NCs with other reported electrocatalysts

| Catalyst                                             | Electrolyte                           | NH <sub>3</sub> yield                                                  | FE(%)        | Reference          |
|------------------------------------------------------|---------------------------------------|------------------------------------------------------------------------|--------------|--------------------|
| <b>Au<sub>4</sub>Cu<sub>2</sub>/G NCs</b>            | <b>0.1 M KOH</b>                      | <b>4.14 μg·h<sup>-1</sup>cm<sup>-2</sup></b>                           | <b>49.60</b> | <b>This work</b>   |
| Cu <sub>6</sub> /GO NCs                              | 0.1 M KOH                             | 4.8 μg·h <sup>-1</sup> cm <sup>-2</sup>                                | 30.39        | Ref. <sup>3</sup>  |
| Bi/carbon black                                      | pH 3.5, 1.0 M K <sup>+</sup>          | 200 mmol NH <sub>3</sub> g <sup>-1</sup> h <sup>-1</sup>               | 66           | Ref. <sup>4</sup>  |
| Cu NPs on Ti <sub>3</sub> C <sub>2</sub>             | 0.1 M KOH                             | 3.04 μmol·h <sup>-1</sup> cm <sup>-2</sup>                             | 7.31         | Ref. <sup>5</sup>  |
| TiO <sub>2</sub> -rGO                                | 0.1 M Na <sub>2</sub> SO <sub>4</sub> | 15.13 μg·h <sup>-1</sup> mg <sup>-1</sup> <sub>cat.</sub>              | 3.3          | Ref. <sup>6</sup>  |
| Ru@ZrO <sub>2</sub> /NC                              | 0.01 M HCl                            | 3.665 mgNH <sub>3</sub> h <sup>-1</sup> mg <sub>Ru</sub> <sup>-1</sup> | 21           | Ref. <sup>7</sup>  |
| Ru NPs                                               | 0.01 M HCl                            | 21.4 mg h <sup>-1</sup> m <sup>-2</sup>                                | 5.4          | Ref. <sup>8</sup>  |
| Ru SAs/N-C                                           | 0.05 M H <sub>2</sub> SO <sub>4</sub> | 120.9 μg h <sup>-1</sup> mg <sup>-1</sup> <sub>cat.</sub>              | 29.6         | Ref. <sup>9</sup>  |
| AuHNCs/ITO                                           | 0.5 M LiClO <sub>4</sub>              | 3.9 μg cm <sup>-2</sup> h <sup>-1</sup>                                | 30.2         | Ref. <sup>10</sup> |
| Au nanorods                                          | 0.1 M KOH                             | 1.6 μg·h <sup>-1</sup> cm <sup>-2</sup>                                | 3.88         | Ref. <sup>11</sup> |
| β-FeOOH nanorod                                      | 0.5 M LiClO <sub>4</sub>              | 23.32 μg·h <sup>-1</sup> mg <sup>-1</sup> <sub>cat.</sub>              | 6.7          | Ref. <sup>12</sup> |
| Au/CeOx                                              | 0.1 M HCl                             | 37.3 μmol h <sup>-1</sup> mg <sub>Au</sub> <sup>-1</sup>               | 10.1         | Ref. <sup>13</sup> |
| TiO <sub>2</sub> nanosheets                          | 0.1 M Na <sub>2</sub> SO <sub>4</sub> | 5.6 μg·h <sup>-1</sup> cm <sup>-2</sup>                                | 2.5          | Ref. <sup>14</sup> |
| Ru–O–V pyramid electron bridge                       | 0.1 M Na <sub>2</sub> SO <sub>4</sub> | 115 μg·h <sup>-1</sup> mg <sup>-1</sup> <sub>cat.</sub>                | 51.48        | Ref. <sup>15</sup> |
| B-TiO <sub>2</sub>                                   | 0.1 M Na <sub>2</sub> SO <sub>4</sub> | 14.4 μg·h <sup>-1</sup> mg <sup>-1</sup> <sub>cat.</sub>               | 3.4          | Ref. <sup>16</sup> |
| Nitrogen oxidation, facilitated by OH·               | 0.1 M K <sub>2</sub> SO <sub>4</sub>  | 8.3 nmol s <sup>-1</sup> cm <sup>-2</sup>                              | 25.6         | Ref. <sup>17</sup> |
| CoO/CuO-NA/CF                                        | 0.5 M NaOH                            | 296.9 μmol·h <sup>-1</sup> cm <sup>-2</sup>                            | 92.9         | Ref. <sup>18</sup> |
| MoS <sub>2</sub> /CC                                 | 0.1 M Na <sub>2</sub> SO <sub>4</sub> | 4.94 μg·h <sup>-1</sup> cm <sup>-2</sup>                               | 1.17         | Ref. <sup>19</sup> |
| Mo SA/BN                                             | 0.1 M KOH                             | 37.67 μg·h <sup>-1</sup> mg <sup>-1</sup> <sub>cat.</sub>              | 13.27        | Ref. <sup>20</sup> |
| Cu SA/N-doped carbon                                 | 0.1 M KOH                             | 53.3 μg·h <sup>-1</sup> mg <sup>-1</sup> <sub>cat.</sub>               | 11.7         | Ref. <sup>21</sup> |
| MoSAs Mo <sub>2</sub> C/NCNTs                        | 0.1 M KOH                             | 16.1 μg. h <sup>-1</sup> μg <sup>-1</sup> <sub>cat.</sub>              | 7.1          | Ref. <sup>20</sup> |
| 1T-MoS <sub>2</sub> /g-C <sub>3</sub> N <sub>4</sub> | 0.1 M KOH                             | 29.97 μg. h <sup>-1</sup> μg <sup>-1</sup> <sub>cat.</sub>             | 20.48        | Ref. <sup>22</sup> |
| FeSA-NO-C                                            | 0.1 M KOH                             | 31.9 μg. h <sup>-1</sup> μg <sup>-1</sup> <sub>cat.</sub>              | 11.8         | Ref. <sup>23</sup> |

## References

1. G. W. Watt and J. D. Chrisp, *Anal. Chem.*, 1952, **24**, 2006–2008.
2. M. J. Frisch, G. W. Trucks, H. B. Schlegel, G. E. Scuseria, M. A. Robb, J. R. Cheeseman, G. Scalmani, V. Barone, G. A. Petersson, H. Nakatsuji, X. Li, M. Caricato, A. V. Marenich, J. Bloino, B. G. Janesko, R. Gomperts, B. Mennucci, H. P. Hratchian, J. V. Ortiz, A. F. Izmaylov, J. L. Sonnenberg, Williams, F. Ding, F. Lipparini, F. Egidi, J. Goings, B. Peng, A. Petrone, T. Henderson, D. Ranasinghe, V. G. Zakrzewski, J. Gao, N. Rega, G. Zheng, W. Liang, M. Hada, M. Ehara, K. Toyota, R. Fukuda, J. Hasegawa, M. Ishida, T. Nakajima, Y. Honda, O. Kitao, H. Nakai, T. Vreven, K. Throssell, J. A. Montgomery Jr., J. E. Peralta, F. Ogliaro, M. J. Bearpark, J. J. Heyd, E. N. Brothers, K. N. Kudin, V. N. Staroverov, T. A. Keith, R. Kobayashi, J. Normand, K. Raghavachari, A. P. Rendell, J. C. Burant, S. S. Iyengar, J. Tomasi, M. Cossi, J. M. Millam, M. Klene, C. Adamo, R. Cammi, J. W. Ochterski, R. L. Martin, K. Morokuma, O.

- Farkas, J. B. Foresman and D. J. Fox, *Journal*, 2016.
3. A. Shehzad, C. Cui, R. Cheng and Z. Luo, *Nanoscale*, 2024, **16**, 14441–14447.
  4. Y.-C. Hao, Y. Guo, L.-W. Chen, M. Shu, X.-Y. Wang, T.-A. Bu, W.-Y. Gao, N. Zhang, X. Su, X. Feng, J.-W. Zhou, B. Wang, C.-W. Hu, A.-X. Yin, R. Si, Y.-W. Zhang and C.-H. Yan, *Nat. Catal.*, 2019, **2**, 448–456.
  5. A. Liu, X. Liang, Q. Yang, X. Ren, M. Gao, Y. Yang and T. Ma, *ChemPlusChem*, 2021, **86**, 166–170.
  6. X. Zhang, Q. Liu, X. Shi, A. M. Asiri, Y. Luo, X. Sun and T. Li, *J. Mater. Chem. A*, 2018, **6**, 17303–17306.
  7. H. C. Tao, C. Choi, L. X. Ding, Z. Jiang, Z. S. Hang, M. W. Jia, Q. Fan, Y. N. Gao, H. H. Wang, A. W. Robertson, S. Hong, Y. S. Jung, S. Z. Liu and Z. Y. Sun, *Chem*, 2019, **5**, 204–214.
  8. D. Wang, L. M. Azofra, M. Harb, L. Cavallo, X. Zhang, B. H. R. Suryanto and D. R. MacFarlane, *ChemSusChem*, 2018, **11**, 3416–3422.
  9. Z. Geng, Y. Liu, X. Kong, P. Li, K. Li, Z. Liu, J. Du, M. Shu, R. Si and J. Zeng, *Adv. Mater.*, 2018, **30**, 1803498.
  10. M. Nazemi, S. R. Panikkanvalappil and M. A. El-Sayed, *Nano Energy*, 2018, **49**, 316–323.
  11. D. Bao, Q. Zhang, F.-L. Meng, H.-X. Zhong, M.-M. Shi, Y. Zhang, J.-M. Yan, Q. Jiang and X.-B. Zhang, *Adv. Mater. (Weinheim, Ger.)*, 2017, **29**, 1604799.
  12. X. Zhu, Z. Liu, Q. Liu, Y. Luo, X. Shi, A. M. Asiri, Y. Wu and X. Sun, *Chem. Commun.*, 2018, **54**, 11332–11335.
  13. S.-J. Li, D. Bao, M.-M. Shi, B.-R. Wulan, J.-M. Yan and Q. Jiang, *Adv. Mater. (Weinheim, Ger.)*, 2017, **29**, 1700001.
  14. R. Zhang, X. Ren, X. Shi, F. Xie, B. Zheng, X. Guo and X. Sun, *ACS Appl. Mater. Interfaces*, 2018, **10**, 28251–28255.
  15. Y. Sun, X. Li, Z. Wang, L. Jiang, B. Mei, W. Fan, J. Wang, J. Zhu and J.-M. Lee, *J. Am. Chem. Soc.*, 2024, **146**, 7752–7762.
  16. Y. Wang, K. Jia, Q. Pan, Y. Xu, Q. Liu, G. Cui, X. Guo and X. Sun, *ACS Sustain. Chem. Eng.*, 2019, **7**, 117–122.
  17. K. Dong, Y. Yao, H. Li, H. Li, S. Sun, X. He, Y. Wang, Y. Luo, D. Zheng, Q. Liu, Q. Li, D. Ma, X. Sun and B. Tang, *Nat. Synth.*, 2024, **3**, 763–773.
  18. S. Chen, G. Qi, R. Yin, Q. Liu, L. Feng, X. Feng, G. Hu, J. Luo, X. Liu and W. Liu, *Nanoscale*, 2023, **15**, 19577–19585.
  19. L. Zhang, X. Ji, X. Ren, Y. Ma, X. Shi, Z. Tian, A. M. Asiri, L. Chen, B. Tang and X. Sun, *Adv. Mater.*, 2018, **30**, e1800191.
  20. L. Shi, S. Bi, Y. Qi, R. He, K. Ren, L. Zheng, J. Wang, G. Ning and J. Ye, *ACS Catal.*, 2022, **12**, 7655–77663.
  21. W. Zang, T. Yang, H. Zou, S. Xi, H. Zhang, X. Liu, Z. Kou, Y. Du, Y. P. Feng, L. Shen, L. Duan, J. Wang and S. J. Pennycook, *ACS Catal.*, 2019, **9**, 10166–10173.
  22. X. Xu, X. Tian, B. Sun, Z. Liang, H. Cui, J. Tian and M. Shao, *Appl. Catal. B- Environ.*, 2020, **272**, 118984.
  23. Y. Li, J. Li, J. Huang, J. Chen, Y. Kong, B. Yang, Z. Li, L. Lei, G. Chai, Z. Wen, L. Dai and Y. Hou, *Angew. Chem. Int. Ed.*, 2021, **60**, 9078–9085.
